# Supplementary material
Source: Springer Nature journal article supplement (https://www.springermedizin.de/resource/supplementary/12993_2012_444_MOESM9_ESM.pdf/9617780)

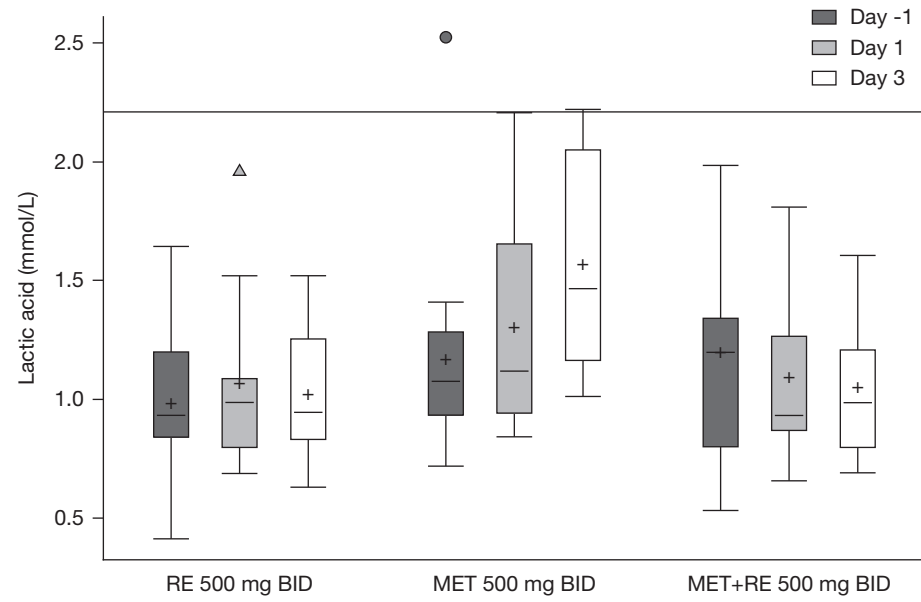

Supplement: MOESM9 [file 9617780]
